# Supplementary material for: Effect of the cyano group on solid state photophysical behavior of tetraphenylethene substituted benzothiadiazoles
Source: Royal Society of Chemistry journal article supplement (doi:10.1039/c5tc01871d), 2015-01-01

## Supporting Information

### Effect of cyano group on solid state photophysical behavior of tetraphenylethene substituted benzothiadiazoles

Thaksen Jadhav, Bhausahab Dhokale, Rajneesh Misra \*

Department of Chemistry,  
Indian Institute of Technology Indore,  
Indore- 452 017, India.

[rajneeshmisra@iiti.ac.in](mailto:rajneeshmisra@iiti.ac.in)

#### Table of Contents

- I. Thermogravimetric analysis
- II. Photophysical properties
- III. Mechanochromism
- IV. DFT calculations
- V. Copies of  $^1\text{H}$  NMR,  $^{13}\text{C}$  NMR and HRMS spectra of the new compounds

## Thermogravimetric analysis

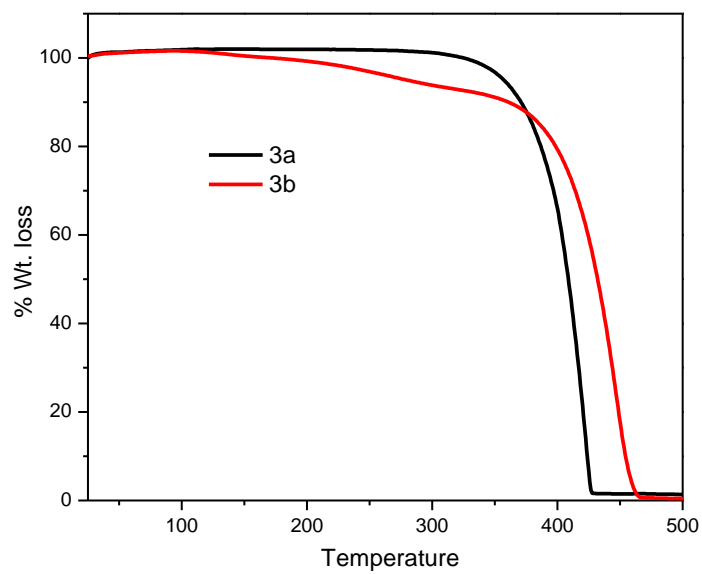

**Fig. S1** Thermogravimetric analysis of **3a** and **3b**, measured at a heating rate of 10 °C/ min under nitrogen atmosphere.

Photophysical properties:

Table S1. Photophysical properties of the 3a and 3b in different solvents.

| Compounds | Solvents        | $\lambda_{\text{abs.}}(\text{nm})$ | $\lambda_{\text{em.}}(\text{nm})$ | Stokes Shift( $\text{cm}^{-1}$ ) | $\Phi_f^a$ |
|-----------|-----------------|------------------------------------|-----------------------------------|----------------------------------|------------|
| <b>3a</b> | Cyclohexane     | 404                                | 509                               | 5106                             | 0.345      |
|           | Toluene         | 403                                | 527                               | 5838                             | 0.289      |
|           | Chloroform      | 403                                | 565                               | 7114                             | 0.238      |
|           | Dichloromethane | 399                                | 579                               | 7791                             | 0.234      |
|           | Acetonitrile    | 391                                | 614                               | 9289                             | 0.137      |
| <b>3b</b> | Cyclohexane     | 410                                | 523                               | 5270                             | 0.317      |
|           | Toluene         | 408                                | 545                               | 6161                             | 0.273      |
|           | Chloroform      | 408                                | 590                               | 7560                             | 0.220      |
|           | Dichloromethane | 401                                | 610                               | 8544                             | 0.233      |
|           | Acetonitrile    | 392                                | 649                               | 10102                            | 0.106      |

<sup>a</sup>The fluorescence quantum yields using Quinine sulfate as a standard in 0.5 M H<sub>2</sub>SO<sub>4</sub> solution.

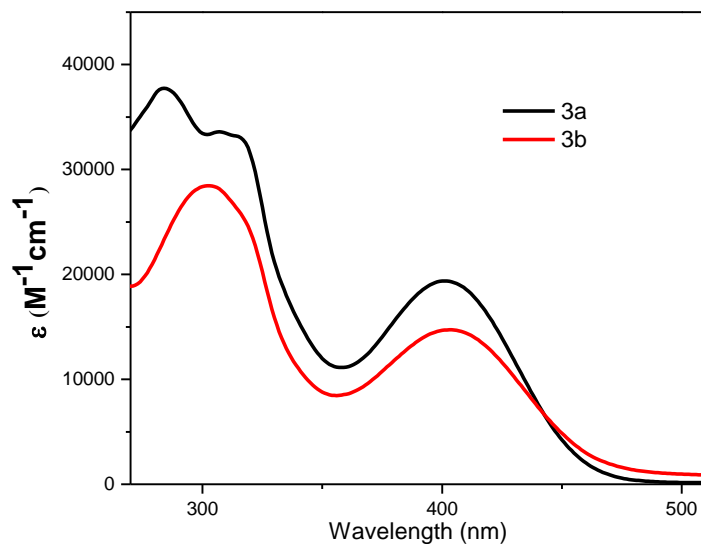

Fig. S2 Absorption spectra of **3a** and **3b** recorded in tetrahydrofuran.

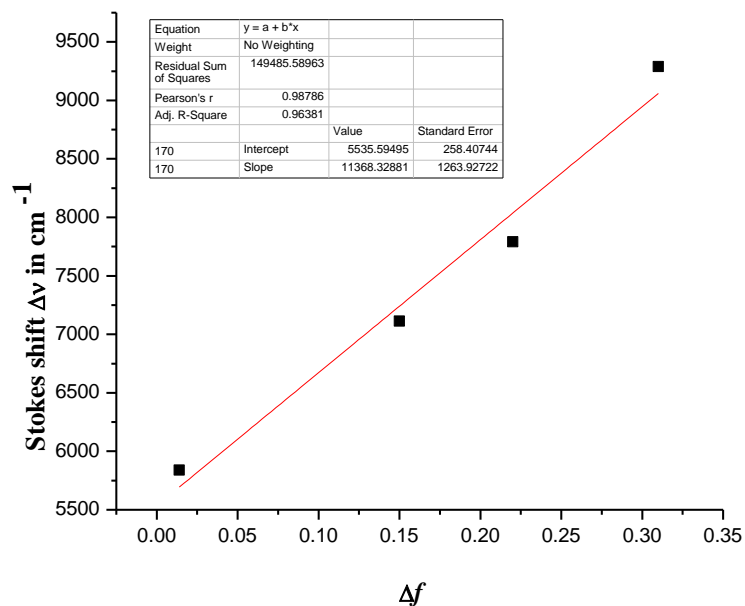

**Fig. S3** Stokes Shift ( $\Delta\nu$ ) of **3a** as a function of the solvent polarity parameter ( $\Delta f$ ).

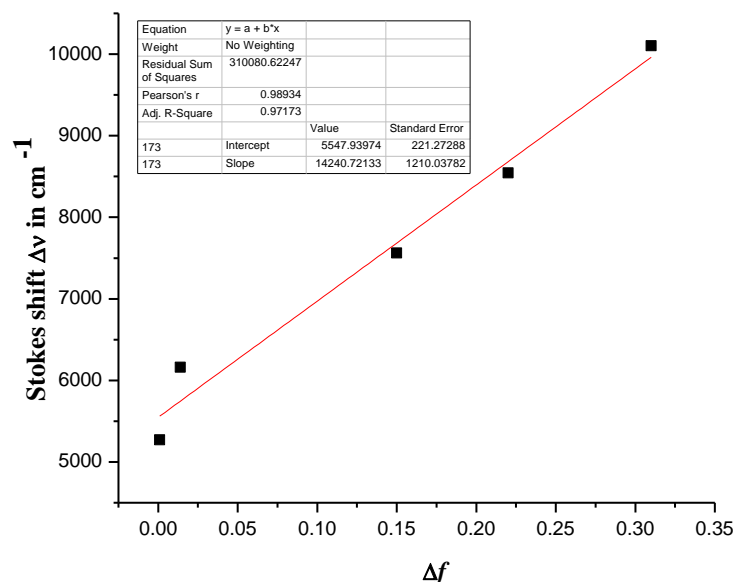

**Fig. S4** Stokes Shift ( $\Delta\nu$ ) of **3b** as a function of the solvent polarity parameter ( $\Delta f$ ).

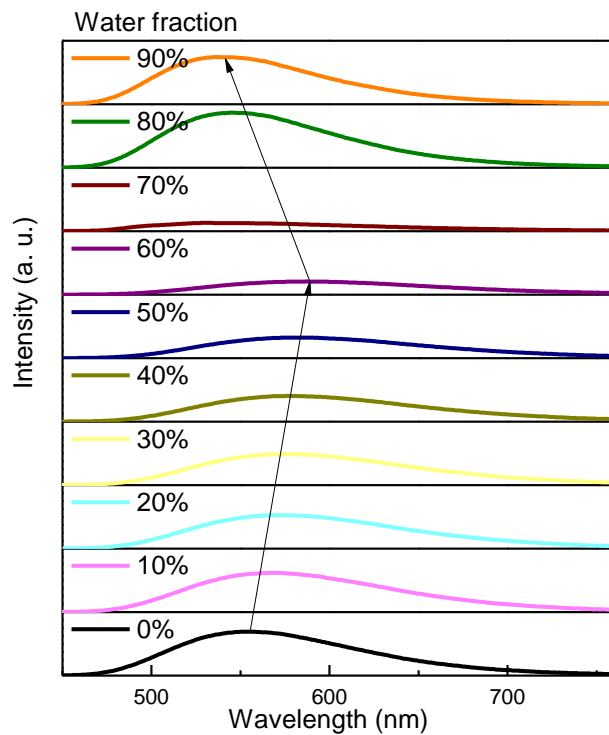

**Fig. S5** Fluorescence spectra of **3a** in THF-Water mixtures with different water fractions.

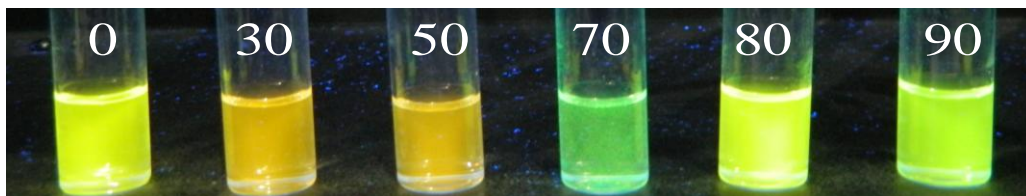

**Fig. S6** Fluorescence pictures of **3a** solutions with different water fractions under UV (365 nm) light.

## Mechanochromism

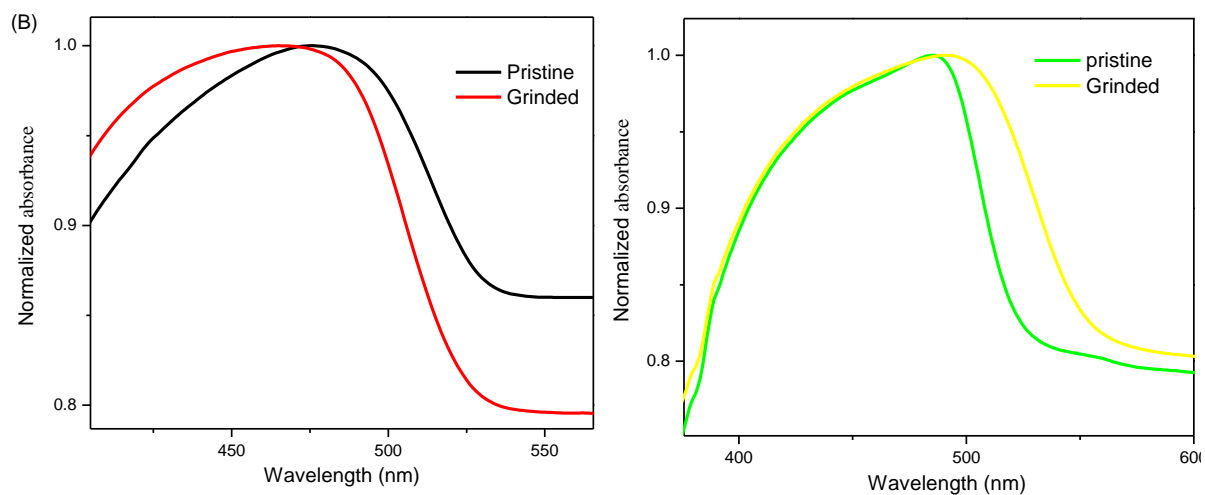

**Fig. S7** Absorption spectra of **3a** (A) and **3b** (B) as Original and Grinded solids.

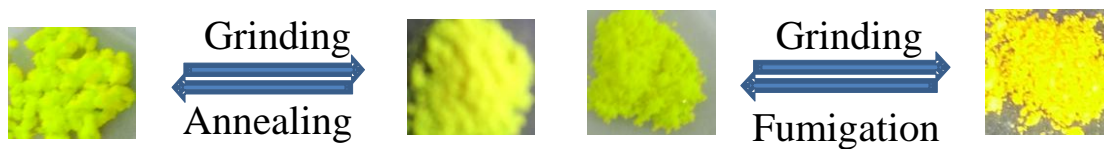

**Fig. S8** The photographs taken under day light of **3a** (left) and **3b** (right).

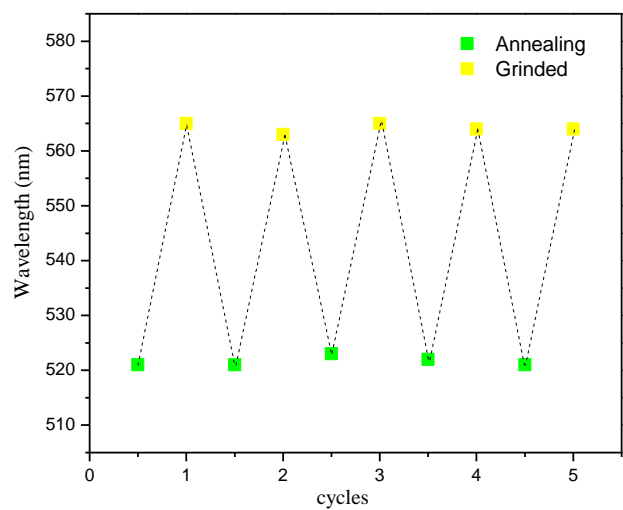

**Fig. S9** Repeated switching of the solid-state fluorescence of **3b** by repeated grinding and fuming cycles.

### DFT calculation data of 3a, and 3b:

Calculation method: B3LYP/6-31+G(d) with Gaussian 09

#### 3a

Standard orientation:

| Center<br>Number | Atomic<br>Number | Atomic<br>Type | Coordinates (Angstroms) |           |           |
|------------------|------------------|----------------|-------------------------|-----------|-----------|
|                  |                  |                | X                       | Y         | Z         |
| 1                | 7                | 0              | -3.168325               | 2.274532  | -0.475447 |
| 2                | 6                | 0              | -3.523474               | 1.018927  | -0.178912 |
| 3                | 6                | 0              | -2.617260               | -0.071245 | 0.074865  |
| 4                | 6                | 0              | -3.220234               | -1.280745 | 0.362079  |
| 5                | 1                | 0              | -2.591848               | -2.148365 | 0.539630  |
| 6                | 6                | 0              | -4.628410               | -1.463948 | 0.421865  |
| 7                | 1                | 0              | -4.996974               | -2.452646 | 0.678905  |
| 8                | 6                | 0              | -5.541608               | -0.454105 | 0.190775  |
| 9                | 6                | 0              | -4.969419               | 0.830886  | -0.114323 |
| 10               | 16               | 0              | -4.556898               | 3.129871  | -0.664688 |
| 11               | 7                | 0              | -5.658956               | 1.948057  | -0.374307 |
| 12               | 6                | 0              | -1.145428               | 0.076517  | 0.050758  |
| 13               | 6                | 0              | -0.489686               | 0.924103  | -0.860447 |
| 14               | 6                | 0              | -0.347640               | -0.660567 | 0.945605  |
| 15               | 6                | 0              | 0.897920                | 1.015821  | -0.879001 |
| 16               | 1                | 0              | -1.072173               | 1.514874  | -1.557069 |
| 17               | 6                | 0              | 1.039171                | -0.574301 | 0.917659  |
| 18               | 1                | 0              | -0.822878               | -1.284516 | 1.697197  |
| 19               | 6                | 0              | 1.696333                | 0.256814  | -0.005336 |
| 20               | 1                | 0              | 1.375869                | 1.683197  | -1.590417 |
| 21               | 1                | 0              | 1.625049                | -1.146669 | 1.629763  |
| 22               | 6                | 0              | 3.183308                | 0.390449  | -0.016498 |
| 23               | 6                | 0              | 4.019793                | -0.690874 | -0.004736 |
| 24               | 6                | 0              | 3.683497                | 1.799345  | -0.043907 |
| 25               | 6                | 0              | 3.144162                | 2.764755  | 0.824635  |
| 26               | 6                | 0              | 4.656951                | 2.211044  | -0.970011 |
| 27               | 6                | 0              | 3.585736                | 4.086495  | 0.790700  |
| 28               | 1                | 0              | 2.375089                | 2.471469  | 1.533787  |
| 29               | 6                | 0              | 5.090508                | 3.535170  | -1.012262 |
| 30               | 1                | 0              | 5.072452                | 1.484280  | -1.661072 |
| 31               | 6                | 0              | 4.561289                | 4.477813  | -0.128567 |
| 32               | 1                | 0              | 3.162795                | 4.812732  | 1.480045  |
| 33               | 1                | 0              | 5.840742                | 3.831486  | -1.740829 |
| 34               | 1                | 0              | 4.900432                | 5.509816  | -0.161132 |
| 35               | 6                | 0              | 5.487822                | -0.573470 | 0.250932  |
| 36               | 6                | 0              | 6.411652                | -1.235446 | -0.577174 |
| 37               | 6                | 0              | 5.981969                | 0.148041  | 1.351000  |
| 38               | 6                | 0              | 7.781521                | -1.151821 | -0.333397 |
| 39               | 1                | 0              | 6.048149                | -1.814810 | -1.421272 |
| 40               | 6                | 0              | 7.351113                | 0.221766  | 1.602398  |
| 41               | 1                | 0              | 5.283192                | 0.651356  | 2.011845  |



|    |   |   |            |           |           |
|----|---|---|------------|-----------|-----------|
| 42 | 6 | 0 | 8.257587   | -0.422825 | 0.758356  |
| 43 | 1 | 0 | 8.477854   | -1.661051 | -0.994755 |
| 44 | 1 | 0 | 7.709753   | 0.781486  | 2.462369  |
| 45 | 1 | 0 | 9.325042   | -0.363484 | 0.953633  |
| 46 | 6 | 0 | 3.538651   | -2.084832 | -0.250846 |
| 47 | 6 | 0 | 3.935598   | -3.137469 | 0.592865  |
| 48 | 6 | 0 | 2.731152   | -2.392479 | -1.359190 |
| 49 | 6 | 0 | 3.512686   | -4.444452 | 0.356215  |
| 50 | 1 | 0 | 4.577688   | -2.923211 | 1.442676  |
| 51 | 6 | 0 | 2.318570   | -3.701416 | -1.603728 |
| 52 | 1 | 0 | 2.429980   | -1.596208 | -2.032814 |
| 53 | 6 | 0 | 2.702326   | -4.732581 | -0.744132 |
| 54 | 1 | 0 | 3.821558   | -5.240079 | 1.029405  |
| 55 | 1 | 0 | 1.699485   | -3.916102 | -2.471020 |
| 56 | 1 | 0 | 2.379624   | -5.752809 | -0.934270 |
| 57 | 6 | 0 | -7.001974  | -0.697153 | 0.244386  |
| 58 | 6 | 0 | -7.527488  | -1.918928 | -0.214362 |
| 59 | 6 | 0 | -7.893910  | 0.252401  | 0.774263  |
| 60 | 6 | 0 | -8.892067  | -2.188579 | -0.136036 |
| 61 | 1 | 0 | -6.862001  | -2.651663 | -0.662018 |
| 62 | 6 | 0 | -9.258210  | -0.020654 | 0.853909  |
| 63 | 1 | 0 | -7.513924  | 1.203798  | 1.126814  |
| 64 | 6 | 0 | -9.764283  | -1.240641 | 0.401895  |
| 65 | 1 | 0 | -9.274957  | -3.136375 | -0.505257 |
| 66 | 1 | 0 | -9.928706  | 0.724672  | 1.273584  |
| 67 | 1 | 0 | -10.829310 | -1.448136 | 0.461801  |

-----  
Total Energy (HF) = - 1971.3872002 Hartree

Data for **3b**:

Standard orientation:

| Center<br>Number | Atomic<br>Number | Atomic<br>Type | Coordinates (Angstroms) |           |           |
|------------------|------------------|----------------|-------------------------|-----------|-----------|
|                  |                  |                | X                       | Y         | Z         |
| 1                | 7                | 0              | -2.616365               | 2.423859  | -0.493964 |
| 2                | 6                | 0              | -3.009429               | 1.175707  | -0.214645 |
| 3                | 6                | 0              | -2.136323               | 0.057395  | 0.035182  |
| 4                | 6                | 0              | -2.775626               | -1.137815 | 0.306423  |
| 5                | 1                | 0              | -2.174179               | -2.024576 | 0.480856  |
| 6                | 6                | 0              | -4.188038               | -1.280893 | 0.350861  |
| 7                | 1                | 0              | -4.585457               | -2.261467 | 0.595693  |
| 8                | 6                | 0              | -5.069246               | -0.241646 | 0.122252  |
| 9                | 6                | 0              | -4.459965               | 1.030214  | -0.162816 |
| 10               | 16               | 0              | -3.975851               | 3.322291  | -0.682566 |
| 11               | 7                | 0              | -5.114485               | 2.170032  | -0.414024 |
| 12               | 6                | 0              | -0.661656               | 0.162854  | 0.024222  |
| 13               | 6                | 0              | 0.025369                | 1.003769  | -0.870041 |

|    |   |   |           |           |           |
|----|---|---|-----------|-----------|-----------|
| 14 | 6 | 0 | 0.106854  | -0.610541 | 0.914420  |
| 15 | 6 | 0 | 1.415024  | 1.053908  | -0.877503 |
| 16 | 1 | 0 | -0.533398 | 1.620562  | -1.563474 |
| 17 | 6 | 0 | 1.495415  | -0.564077 | 0.898296  |
| 18 | 1 | 0 | -0.391738 | -1.230473 | 1.654139  |
| 19 | 6 | 0 | 2.184091  | 0.259713  | -0.008602 |
| 20 | 1 | 0 | 1.917758  | 1.716095  | -1.576416 |
| 21 | 1 | 0 | 2.058289  | -1.162833 | 1.607056  |
| 22 | 6 | 0 | 3.674107  | 0.350416  | -0.007369 |
| 23 | 6 | 0 | 4.479610  | -0.754211 | 0.004000  |
| 24 | 6 | 0 | 4.214865  | 1.744558  | -0.022024 |
| 25 | 6 | 0 | 3.703214  | 2.717677  | 0.854605  |
| 26 | 6 | 0 | 5.201773  | 2.134857  | -0.943007 |
| 27 | 6 | 0 | 4.184245  | 4.025852  | 0.833146  |
| 28 | 1 | 0 | 2.925257  | 2.441128  | 1.560870  |
| 29 | 6 | 0 | 5.675112  | 3.445669  | -0.972519 |
| 30 | 1 | 0 | 5.596767  | 1.401832  | -1.639446 |
| 31 | 6 | 0 | 5.172732  | 4.395745  | -0.081164 |
| 32 | 1 | 0 | 3.782599  | 4.758267  | 1.528618  |
| 33 | 1 | 0 | 6.435474  | 3.725790  | -1.696909 |
| 34 | 1 | 0 | 5.542974  | 5.417232  | -0.103716 |
| 35 | 6 | 0 | 5.948397  | -0.679150 | 0.270535  |
| 36 | 6 | 0 | 6.859141  | -1.361577 | -0.555400 |
| 37 | 6 | 0 | 6.454091  | 0.021032  | 1.379045  |
| 38 | 6 | 0 | 8.228949  | -1.318063 | -0.301113 |
| 39 | 1 | 0 | 6.485841  | -1.925035 | -1.405969 |
| 40 | 6 | 0 | 7.822809  | 0.054181  | 1.641059  |
| 41 | 1 | 0 | 5.764909  | 0.539582  | 2.038170  |
| 42 | 6 | 0 | 8.716979  | -0.610050 | 0.799146  |
| 43 | 1 | 0 | 8.915649  | -1.842252 | -0.960772 |
| 44 | 1 | 0 | 8.190671  | 0.597694  | 2.507457  |
| 45 | 1 | 0 | 9.784149  | -0.582104 | 1.002622  |
| 46 | 6 | 0 | 3.961616  | -2.132650 | -0.253519 |
| 47 | 6 | 0 | 4.322083  | -3.199851 | 0.588337  |
| 48 | 6 | 0 | 3.154300  | -2.412033 | -1.369410 |
| 49 | 6 | 0 | 3.863911  | -4.493099 | 0.342417  |
| 50 | 1 | 0 | 4.963476  | -3.007930 | 1.443974  |
| 51 | 6 | 0 | 2.706649  | -3.707676 | -1.623232 |
| 52 | 1 | 0 | 2.881973  | -1.604688 | -2.042198 |
| 53 | 6 | 0 | 3.054289  | -4.753097 | -0.765494 |
| 54 | 1 | 0 | 4.144953  | -5.300225 | 1.014041  |
| 55 | 1 | 0 | 2.089145  | -3.901038 | -2.496626 |
| 56 | 1 | 0 | 2.704643  | -5.762941 | -0.963084 |
| 57 | 6 | 0 | -6.534737 | -0.443589 | 0.164169  |
| 58 | 6 | 0 | -7.090907 | -1.658149 | -0.281427 |
| 59 | 6 | 0 | -7.407291 | 0.540155  | 0.666760  |
| 60 | 6 | 0 | -8.457868 | -1.893850 | -0.216409 |
| 61 | 1 | 0 | -6.444798 | -2.417592 | -0.710562 |
| 62 | 6 | 0 | -8.776231 | 0.313450  | 0.737107  |
| 63 | 1 | 0 | -7.007188 | 1.487614  | 1.005094  |
| 64 | 6 | 0 | -9.315086 | -0.907355 | 0.298469  |
| 65 | 1 | 0 | -8.870484 | -2.832646 | -0.571626 |

|    |   |   |            |           |          |
|----|---|---|------------|-----------|----------|
| 66 | 1 | 0 | -9.435850  | 1.078113  | 1.134566 |
| 67 | 6 | 0 | -10.726839 | -1.142847 | 0.368923 |
| 68 | 7 | 0 | -11.872885 | -1.335940 | 0.427508 |

---

Total Energy (HF) = - 2063.6309771 Hartree

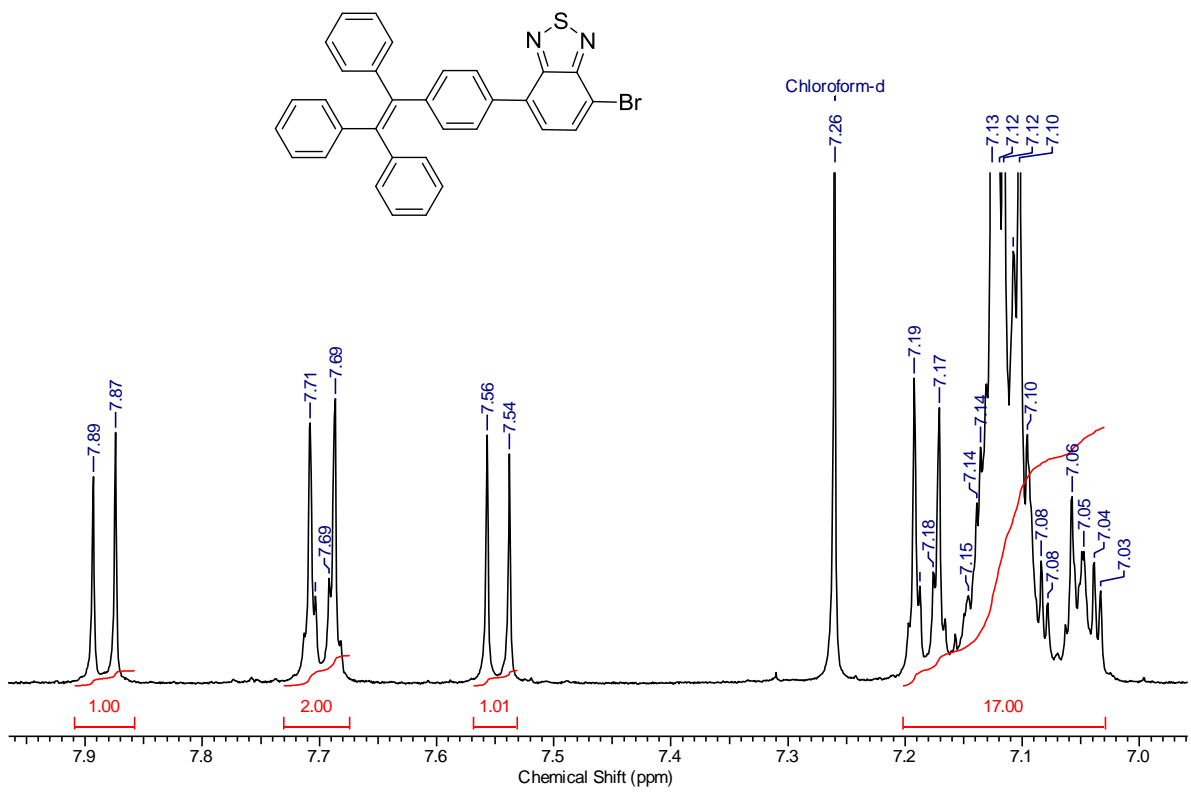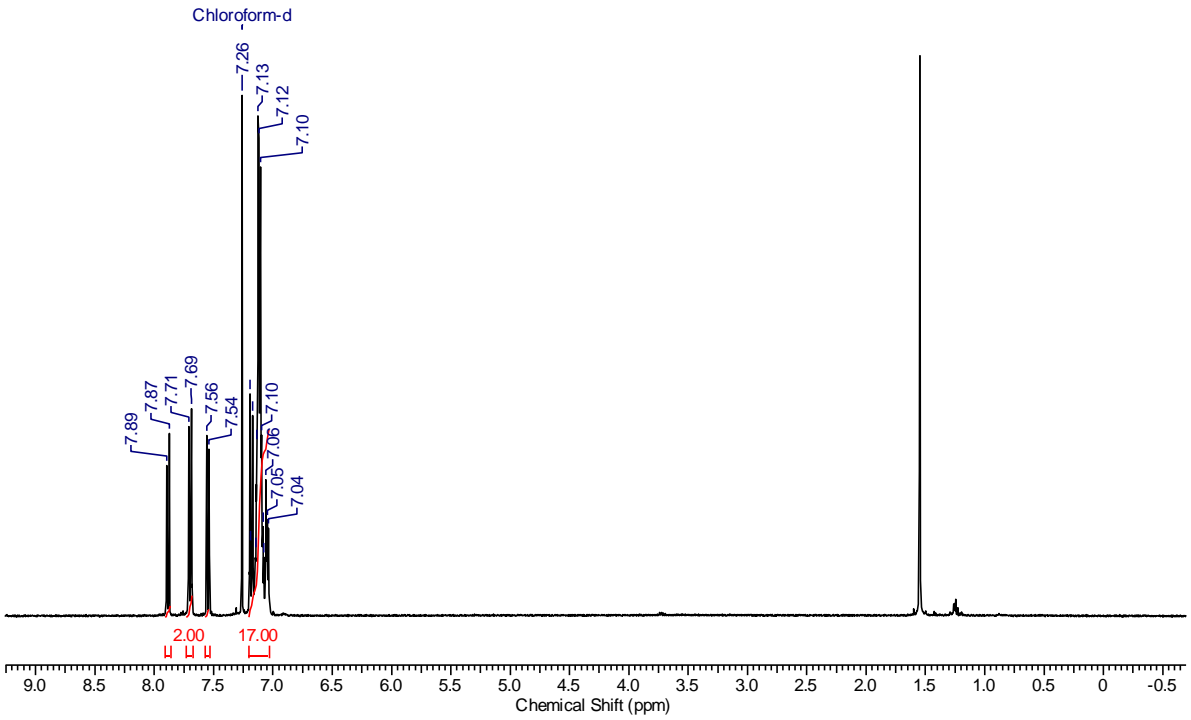

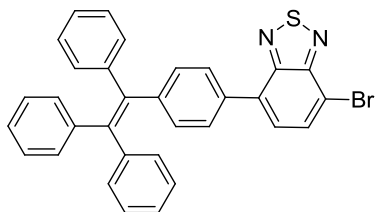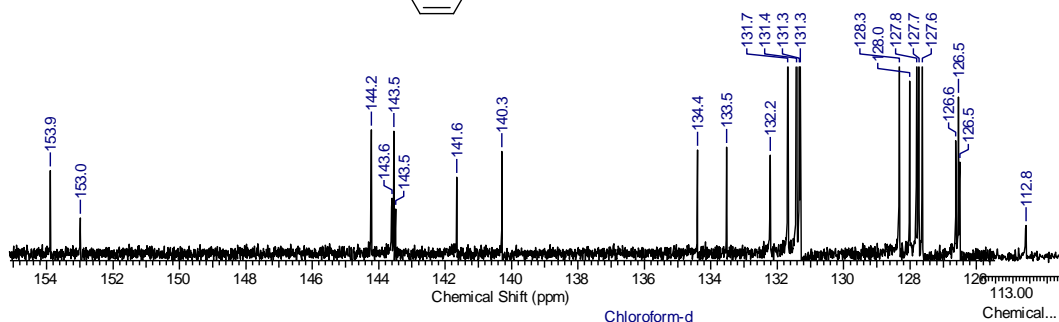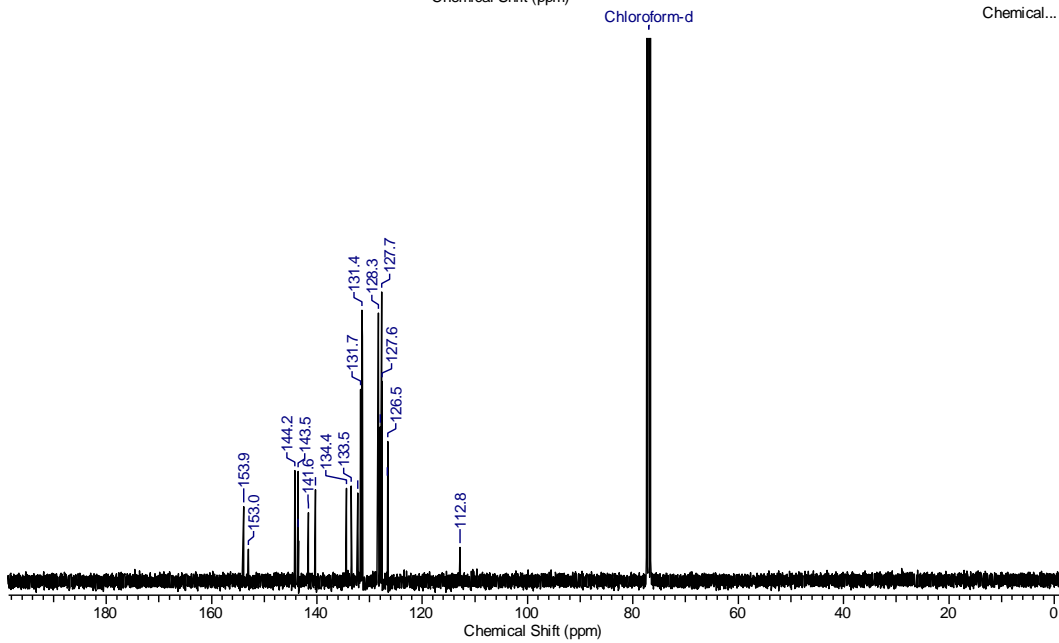

# Display Report

## Analysis Info

Analysis Name D:\Data\May 2014\rm-tj-03-122\_.d  
Method tune\_low.m  
Sample Name rm-tj-03-122\_  
Comment

Acquisition Date 5/7/2014 3:56:11 PM

Operator Ghanashyam Bhavsar  
Instrument micrOTOF-Q II 10348

## Acquisition Parameter

|             |            |                       |           |                  |           |
|-------------|------------|-----------------------|-----------|------------------|-----------|
| Source Type | ESI        | Ion Polarity          | Positive  | Set Nebulizer    | 0.4 Bar   |
| Focus       | Not active | Set Capillary         | 4500 V    | Set Dry Heater   | 180 °C    |
| Scan Begin  | 50 m/z     | Set End Plate Offset  | -500 V    | Set Dry Gas      | 4.0 l/min |
| Scan End    | 2000 m/z   | Set Collision Cell RF | 150.0 Vpp | Set Divert Valve | Waste     |

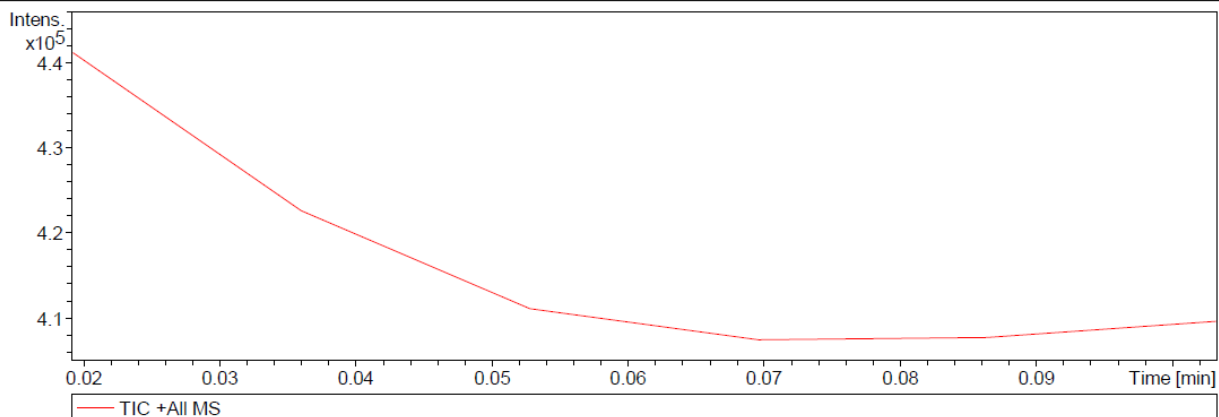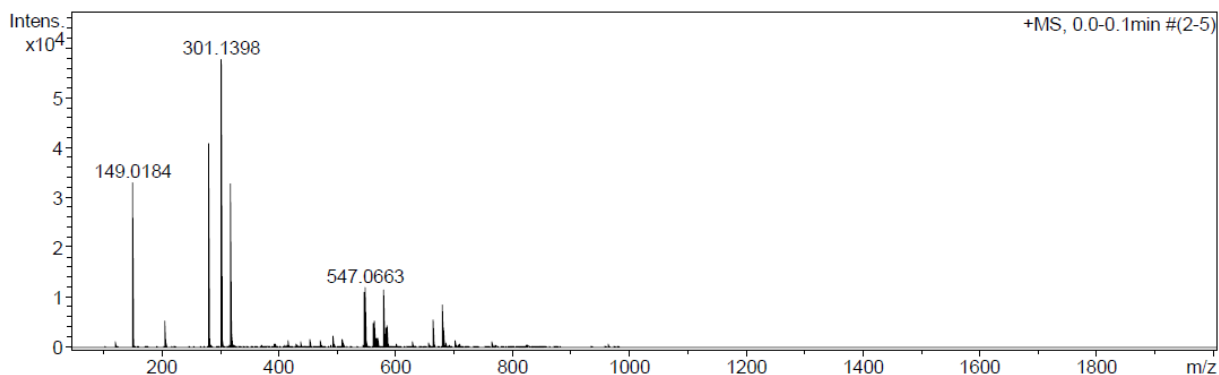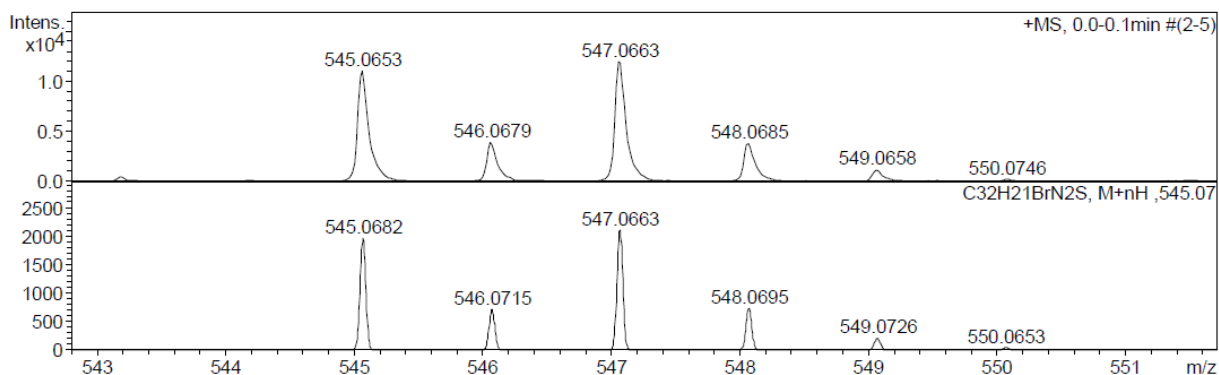

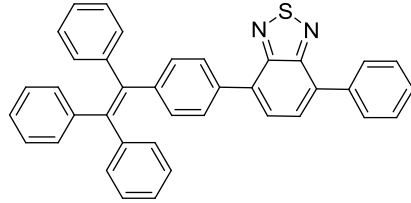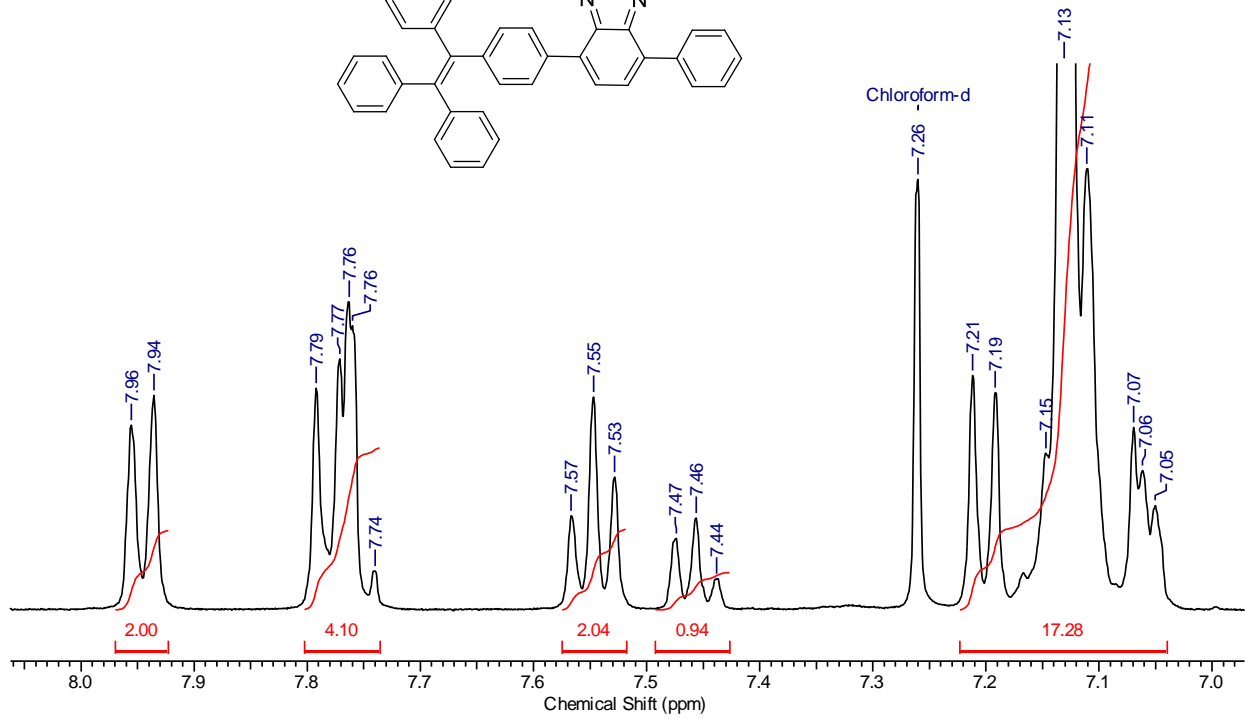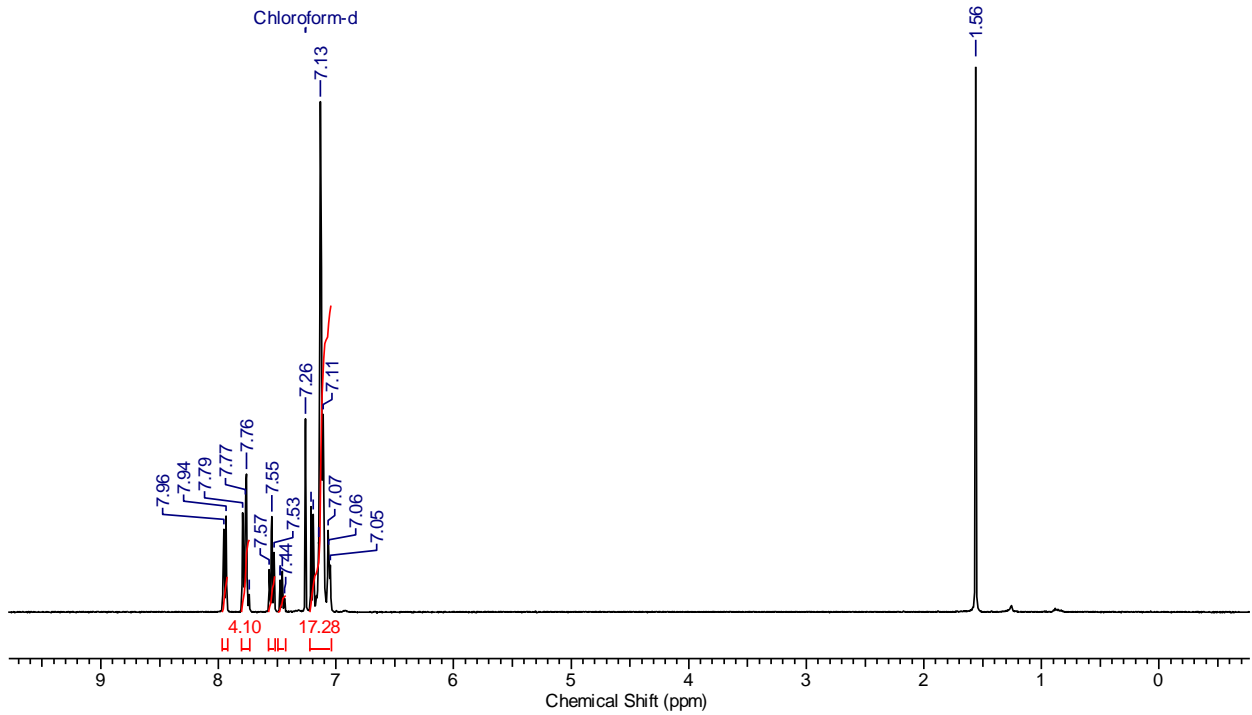

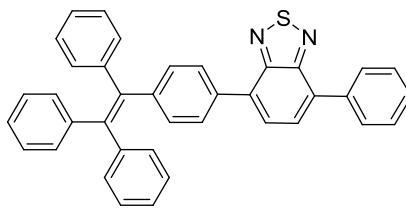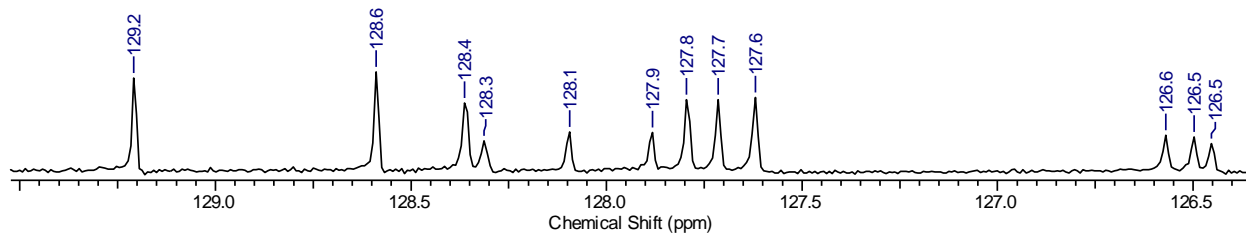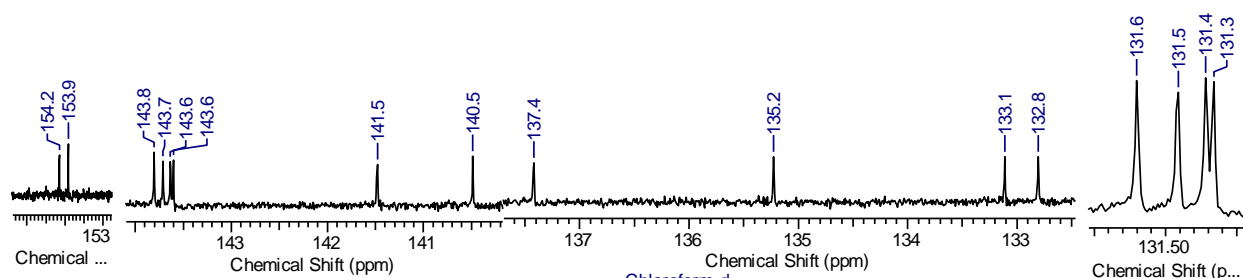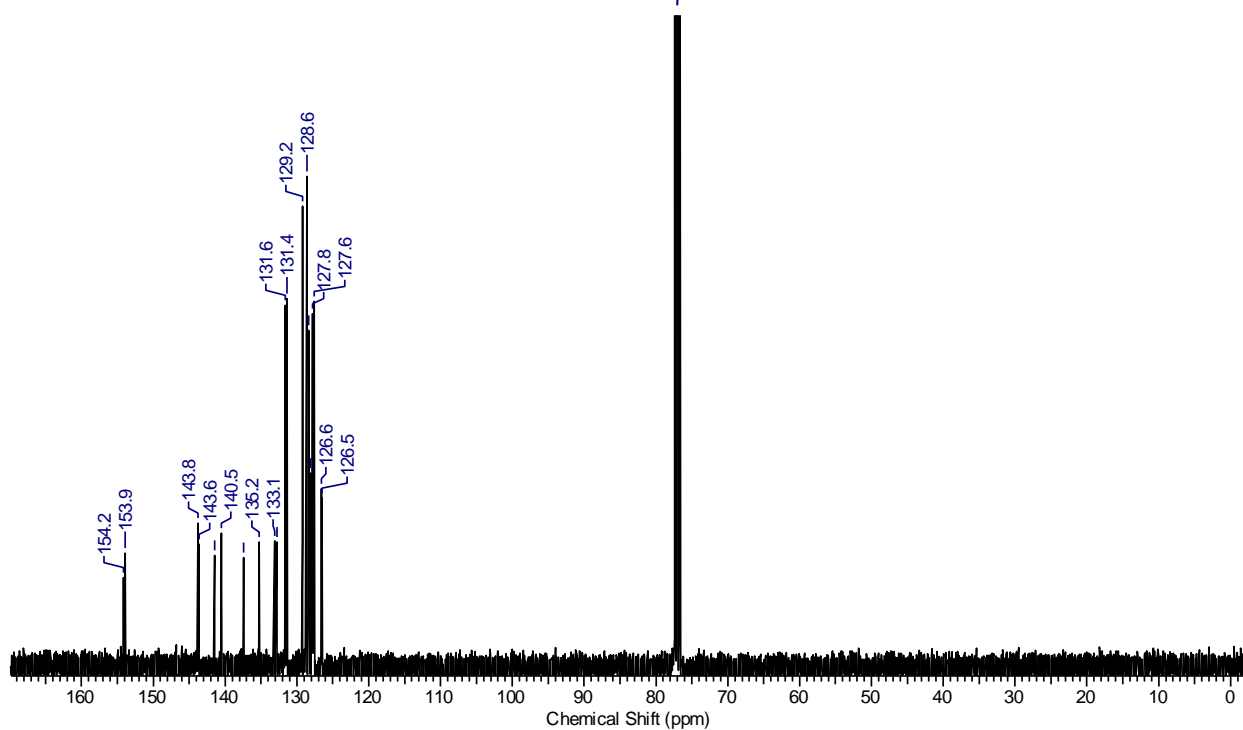



# Display Report

## Analysis Info

Analysis Name D:\Data\February 2015\rm-tj-03-170.d  
Method tune\_low.m  
Sample Name 1  
Comment

Acquisition Date 2/17/2015 3:50:22 PM

Operator Ghanashyam Bhavsar  
Instrument micrOTOF-Q II 10348

## Acquisition Parameter

|             |            |                       |           |                  |           |
|-------------|------------|-----------------------|-----------|------------------|-----------|
| Source Type | ESI        | Ion Polarity          | Positive  | Set Nebulizer    | 0.4 Bar   |
| Focus       | Not active | Set Capillary         | 4500 V    | Set Dry Heater   | 180 °C    |
| Scan Begin  | 21 m/z     | Set End Plate Offset  | -500 V    | Set Dry Gas      | 4.0 l/min |
| Scan End    | 2000 m/z   | Set Collision Cell RF | 150.0 Vpp | Set Divert Valve | Waste     |

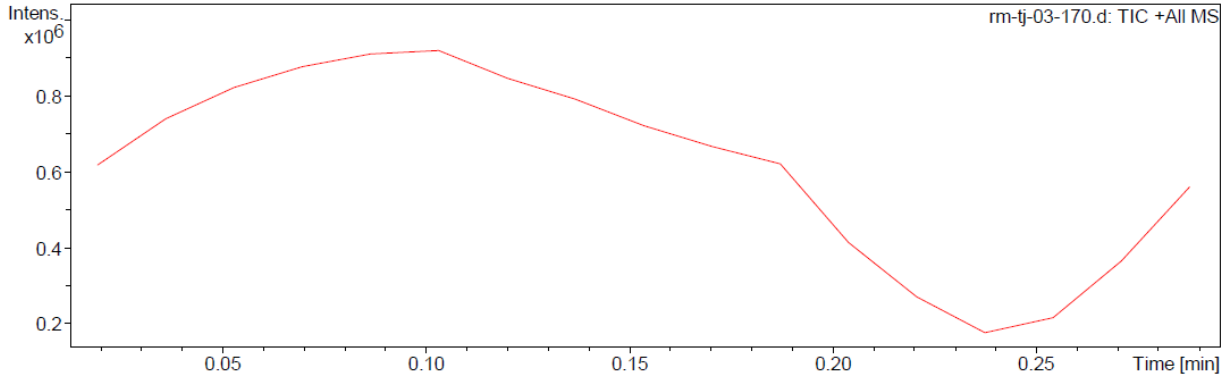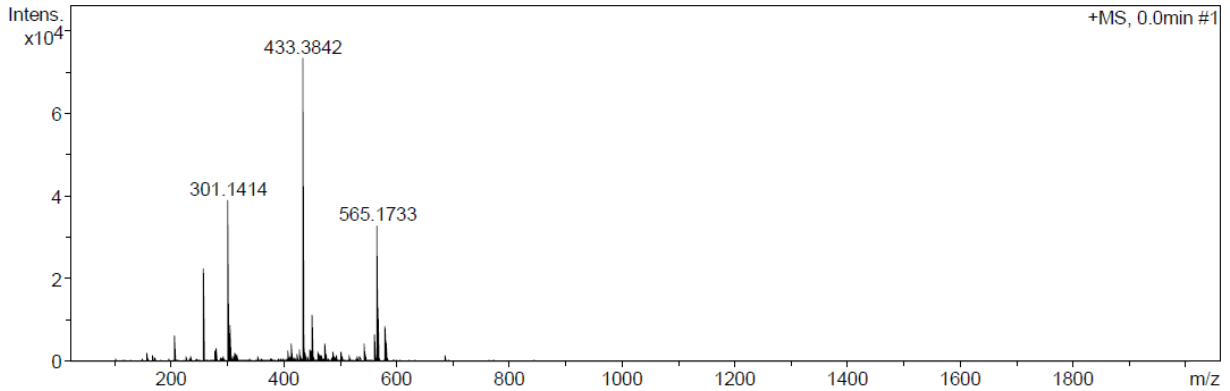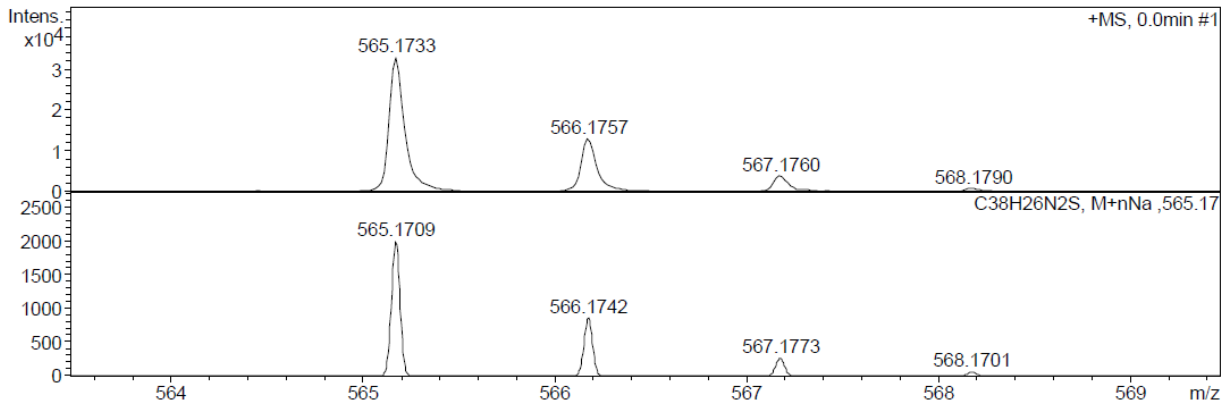

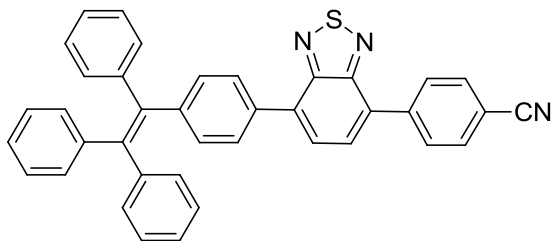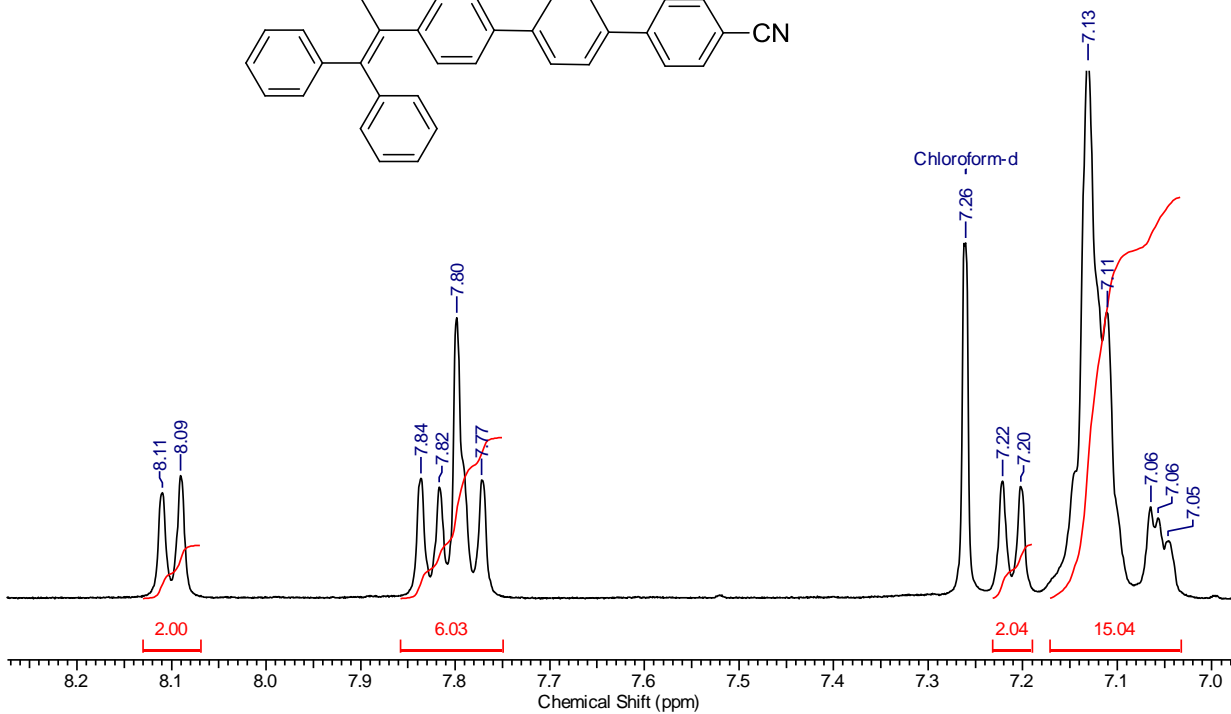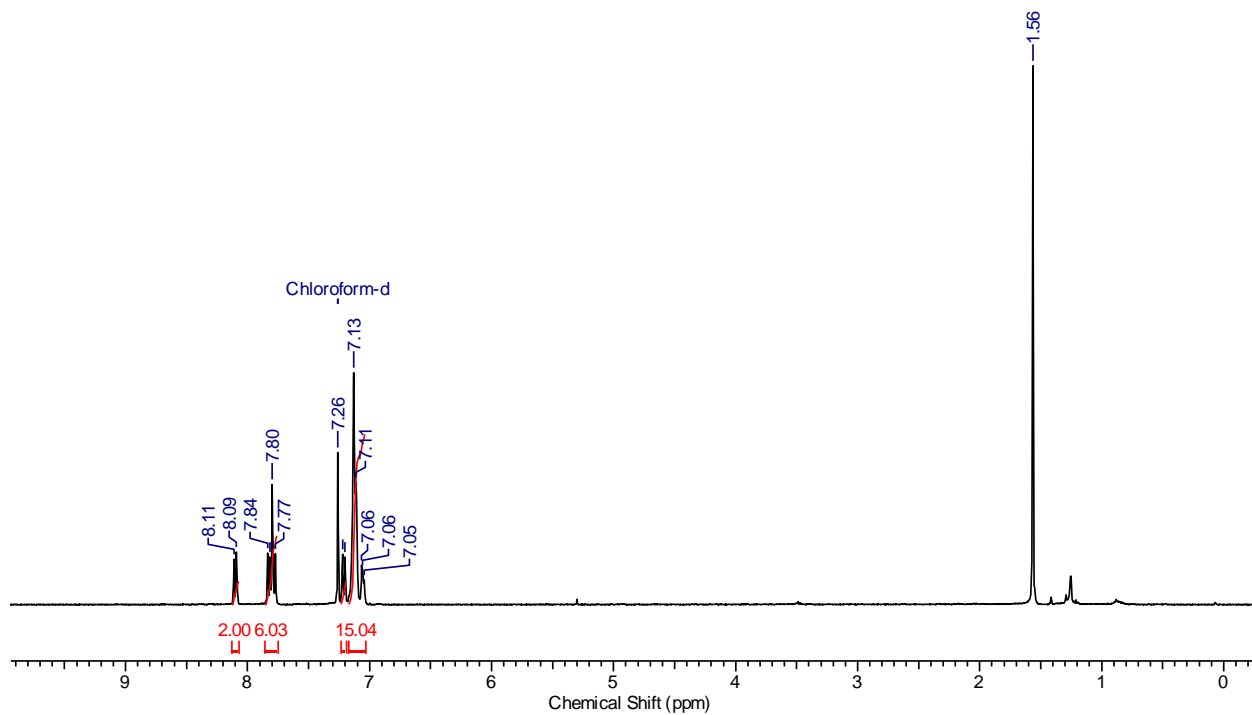

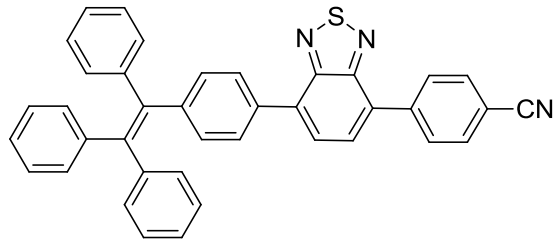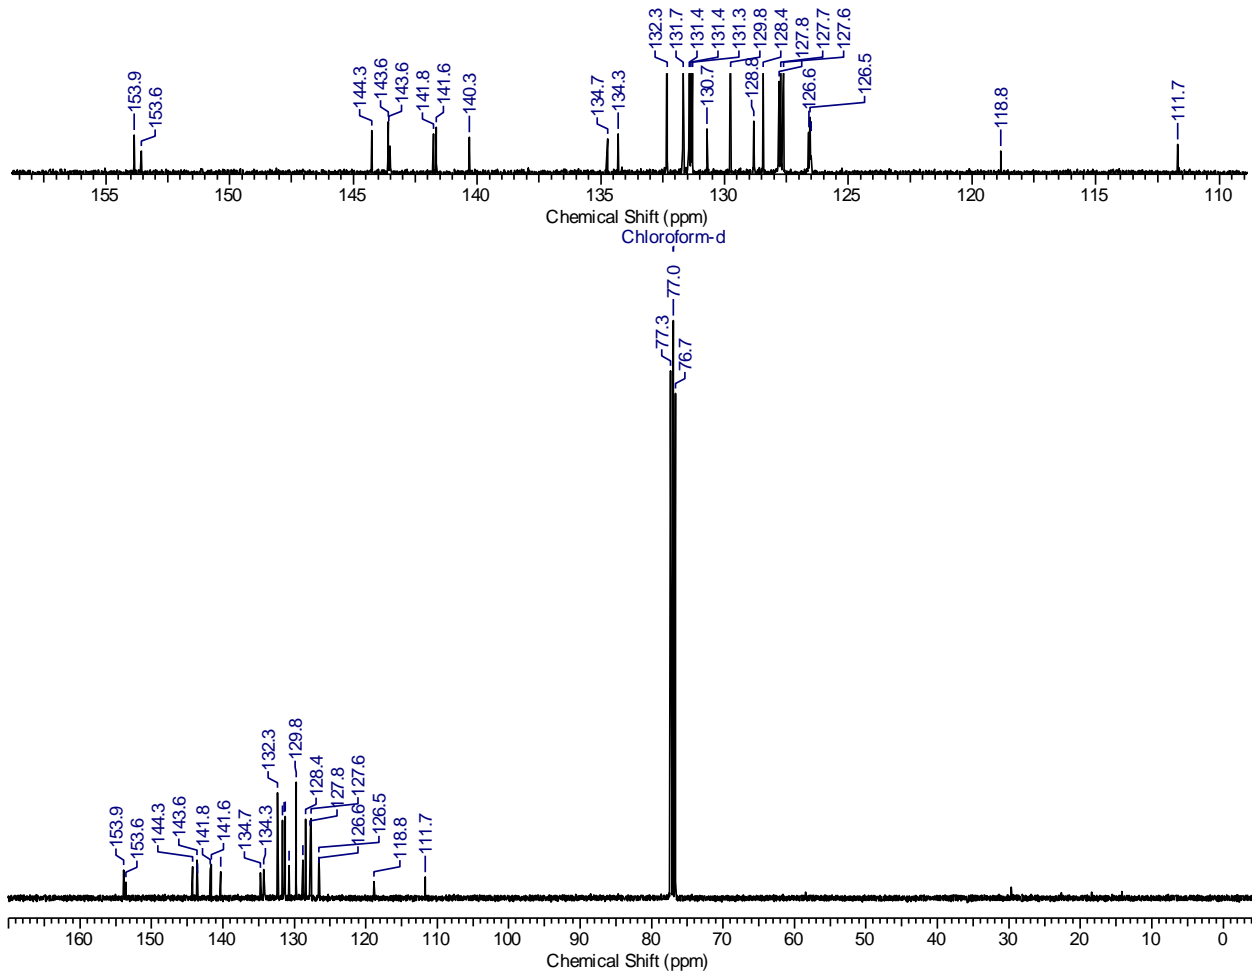

# Display Report

## Analysis Info

Analysis Name D:\Data\February 2015\rm-tj-03-173.d  
Method tune\_wide.m  
Sample Name 1  
Comment

Acquisition Date 2/18/2015 1:35:14 PM

Operator Ghanashyam Bhavsar  
Instrument micrOTOF-Q II 10348

## Acquisition Parameter

|             |            |                       |           |                  |           |
|-------------|------------|-----------------------|-----------|------------------|-----------|
| Source Type | ESI        | Ion Polarity          | Positive  | Set Nebulizer    | 0.4 Bar   |
| Focus       | Not active | Set Capillary         | 4500 V    | Set Dry Heater   | 180 °C    |
| Scan Begin  | 21 m/z     | Set End Plate Offset  | -500 V    | Set Dry Gas      | 4.0 l/min |
| Scan End    | 3000 m/z   | Set Collision Cell RF | 650.0 Vpp | Set Divert Valve | Waste     |

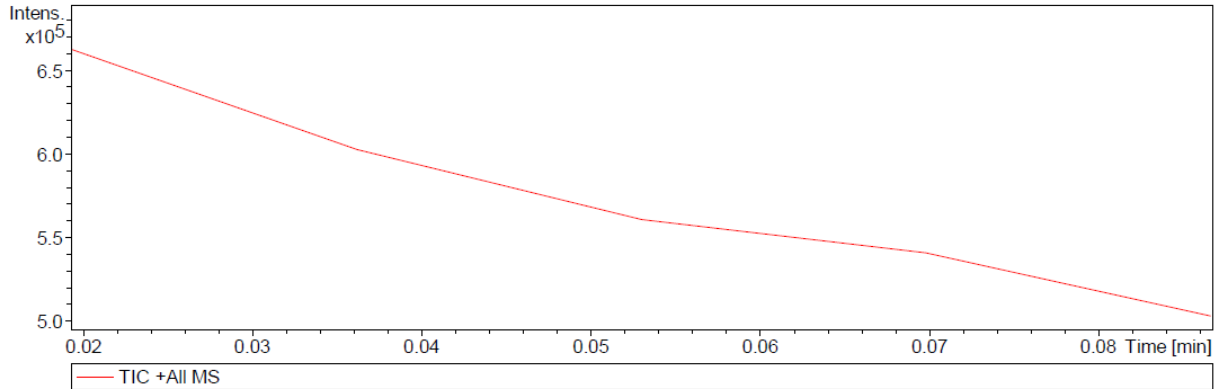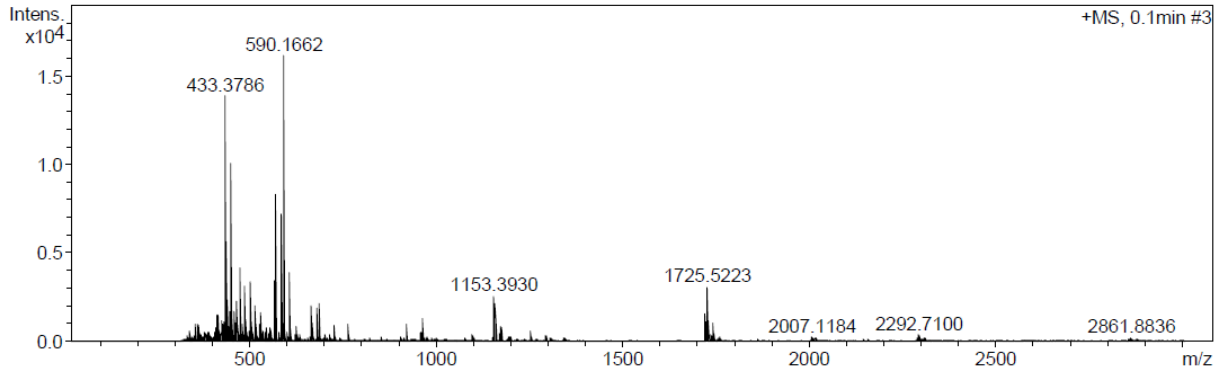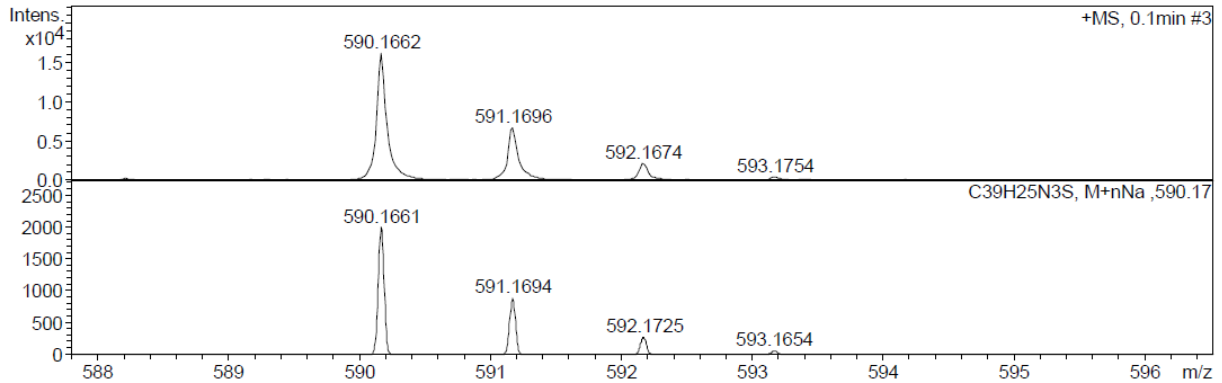

Supplement: c5tc01871d1.pdf [file c5tc01871d1.pdf]
